# Supplementary material
Source: PubMed Central journal article supplement (PMC3380304)

1 **Supplemental Figure Legend**

2

3 **Supplemental Figure 1: Activation of islet ER $\beta$  suppresses SREBP1c and ChREBP mRNA**

4 **expression.** (A) Effect of *in vitro* E2 ( $10^{-8}$ M) treatment (4h) on gene expression of lipogenic

5 genes in ER $\beta$ KO<sup>-/-</sup> islets (n = at least 3 experiments). Results represent the mean $\pm$ SE. \* vs. 11mM

6 glucose when not indicated. \*p<0.05, \*\*p<0.01, \*\*\*p<0.001.

Supp. Figure 1

A

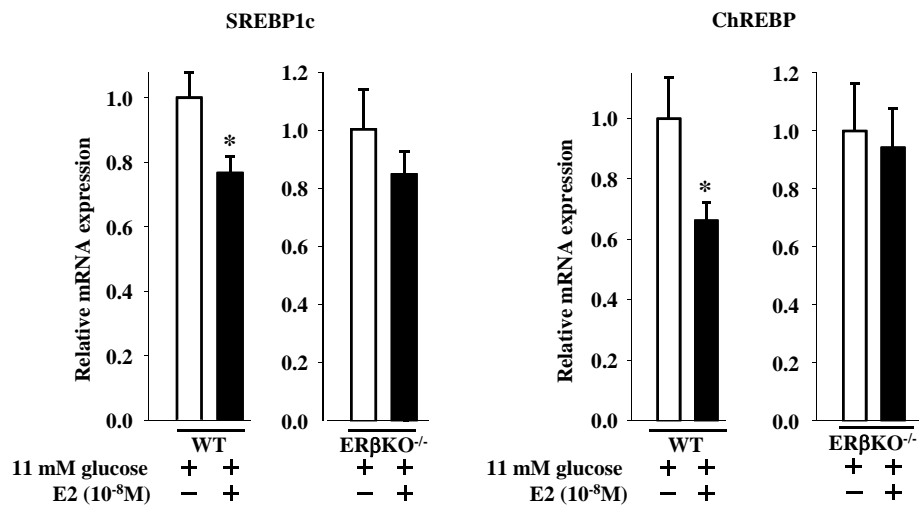

Supplement: supp_en.2011-1980_en-11-1980Supp._figure.pdf [file supp_en.2011-1980_en-11-1980Supp._figure.pdf]
